# Supplementary material for: Rural–Urban Disparities in Patient Care Experiences among Prostate Cancer Survivors: A SEER-CAHPS Study
Source: MDPI journal article supplement (doi:10.3390/cancers15071939), 2023-03-23
Supplement: s1 [file s1]

**Supplementary Table S1: Least-square mean estimates and adjusted differences in mean patient experience measures by rural-urban status**

| Patient Care Experience Measure                    | Big Metro                           | Metro                               |                                             |         | Rural                               |                                             |         |
|----------------------------------------------------|-------------------------------------|-------------------------------------|---------------------------------------------|---------|-------------------------------------|---------------------------------------------|---------|
|                                                    | Least-square mean estimate $\pm$ SE | Least-square mean estimate $\pm$ SE | Adjusted difference from Big Metro (95% CI) | p-value | Least-square mean estimate $\pm$ SE | Adjusted difference from Big Metro (95% CI) | p-value |
| <b>Getting needed care (n=2,460)</b>               | 84.5 $\pm$ 6.2                      | 85.0 $\pm$ 6.2                      | 0.5 (-1.2 to 2.2)                           | 0.552   | 86.2 $\pm$ 6.3                      | 1.6 (-1.1 to 4.4)                           | 0.238   |
| <b>Getting care quickly (n=2,864)</b>              | 59.7 $\pm$ 6.0                      | 60.7 $\pm$ 6.0                      | 0.9 (-1.0 to 2.9)                           | 0.357   | 60.6 $\pm$ 6.1                      | 0.9 (-2.3 to 4.0)                           | 0.599   |
| <b>Doctor communication (n=2,504)</b>              | 85.2 $\pm$ 4.9                      | 85.5 $\pm$ 4.9                      | 0.3 (-1.0 to 1.6)                           | 0.673   | 86.9 $\pm$ 5.0                      | 1.7 (-0.4 to 3.8)                           | 0.119   |
| <b>Getting needed prescription drugs (n=1,811)</b> | 91.4 $\pm$ 6.2                      | 92.9 $\pm$ 6.2                      | 1.4 (-0.5 to 3.4)                           | 0.153   | 94.2 $\pm$ 6.3                      | 2.8 (-0.5 to 6.0)                           | 0.097   |
| <b>Customer service (n=878)</b>                    | 68.5 $\pm$ 8.7                      | 67.0 $\pm$ 8.7                      | -1.5 (-5.2 to 2.2)                          | 0.429   | 65.2 $\pm$ 9.2                      | -3.2 (-9.8 to 3.4)                          | 0.342   |
|                                                    |                                     |                                     |                                             |         |                                     |                                             |         |
| <b>Primary care provider rating (n=2,494)</b>      | 87.3 $\pm$ 4.4                      | 87.7 $\pm$ 4.4                      | 0.4 (-0.7 to 1.6)                           | 0.469   | 87.7 $\pm$ 4.5                      | 0.4 (-1.5 to 2.3)                           | 0.645   |
| <b>Specialist rating (n=2,089)</b>                 | 86.2 $\pm$ 5.0                      | 86.4 $\pm$ 5.1                      | 0.2 (-1.1 to 1.5)                           | 0.767   | 85.9 $\pm$ 5.2                      | -0.3 (-2.5 to 1.9)                          | 0.780   |
| <b>Health plan rating (n=2,956)</b>                | 85.2 $\pm$ 4.5                      | 84.2 $\pm$ 4.5                      | -1.0 (-2.4 to 0.4)                          | 0.151   | 83.9 $\pm$ 4.6                      | -1.4 (-3.7 to 0.9)                          | 0.238   |
| <b>Overall care rating (n=2,913)</b>               | 87.8 $\pm$ 4.1                      | 87.8 $\pm$ 4.0                      | 0.0 (-1.2 to 1.3)                           | 0.953   | 87.8 $\pm$ 4.1                      | 0.0 (-2.1 to 2.0)                           | 0.981   |

SE – Standard Error

CI – Confidence Interval
